# Supplementary material
Source: Preprints.org preprint supplement (doi:10.20944/preprints202004.0529.v2)

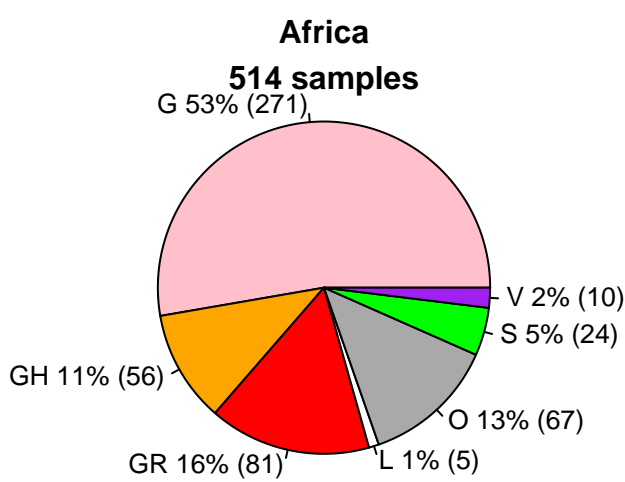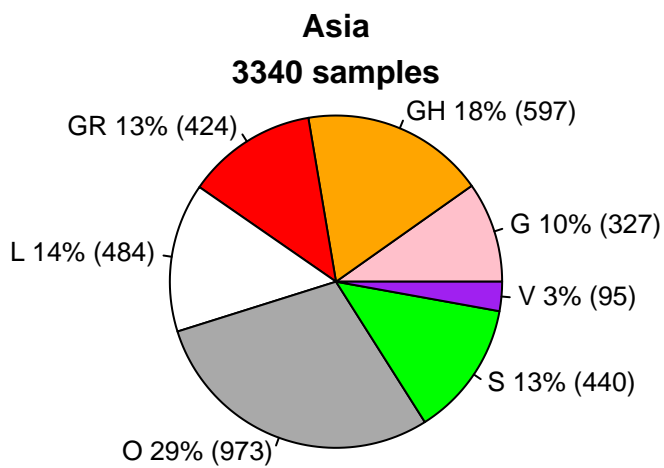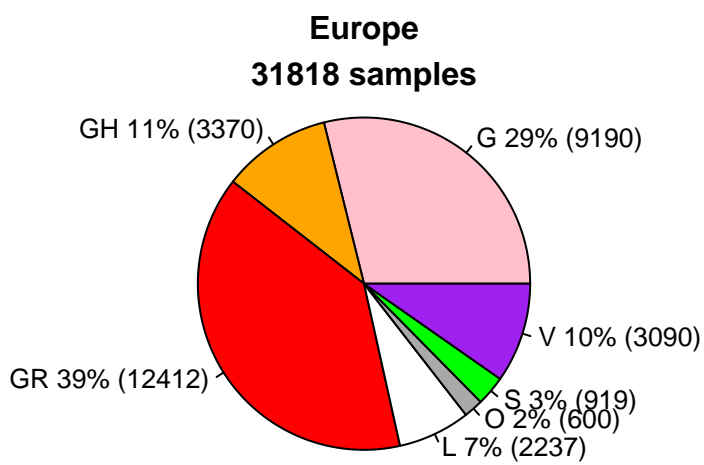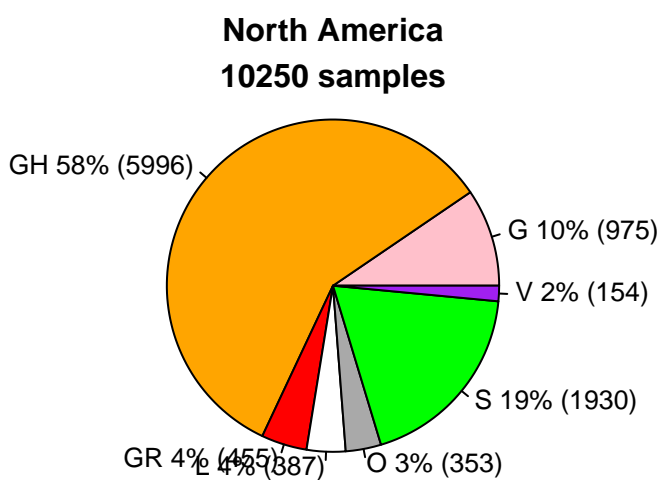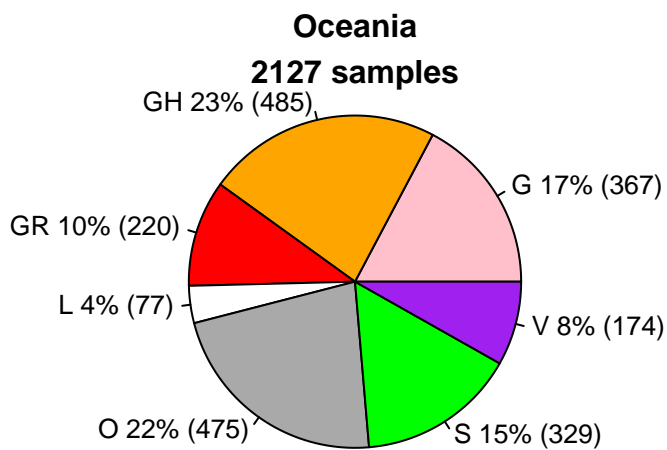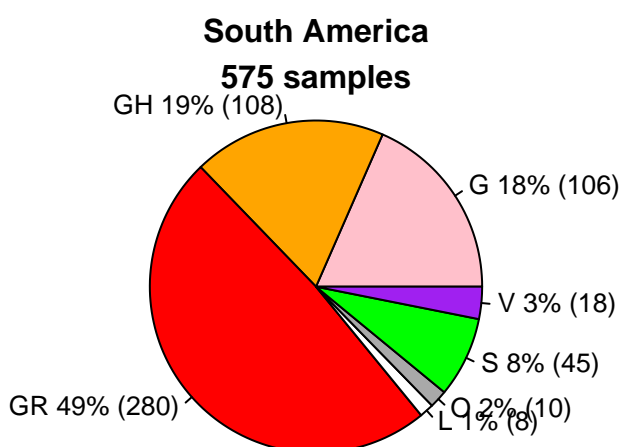

Supplement: Supplementary file [file supplementary]
